# Supplementary material for: Comparing effectiveness of physiotherapy versus drug management on fatigue, physical functioning, and episodic disability for myalgic encephalomyelitis in post-COVID-19 condition: a study protocol of randomized control trial
Source: PubMed Central journal article supplement (PMC11094988; doi:10.1186/s13063-024-08077-x), 2024-05-15
Supplement: 13063_2024_8077_MOESM1_ESM.pdf [file 13063_2024_8077_MOESM1_ESM.pdf]

**FULL DETAILS (Read-only) -> [Click Here to Create PDF for Current Dataset of Trial](#)**

|                                                                                                                                                                              |                                                                                                                                                                                    |                                                                                                                                                              |  |
|------------------------------------------------------------------------------------------------------------------------------------------------------------------------------|------------------------------------------------------------------------------------------------------------------------------------------------------------------------------------|--------------------------------------------------------------------------------------------------------------------------------------------------------------|--|
| <b>CTRI No</b>                                                                                                                                                               | <b>CTRI/2024/01/061987</b> [Registered on: 29/01/2024] <b>Trial Registered Prospectively</b>                                                                                       |                                                                                                                                                              |  |
| <b>Acknowledgement Number</b>                                                                                                                                                | REF/2024/01/077243                                                                                                                                                                 |                                                                                                                                                              |  |
| <b>Last Modified On:</b>                                                                                                                                                     | 11/01/2024                                                                                                                                                                         |                                                                                                                                                              |  |
| <b>Post Graduate Thesis</b>                                                                                                                                                  | Yes                                                                                                                                                                                |                                                                                                                                                              |  |
| <b>Type of Trial</b>                                                                                                                                                         | Interventional                                                                                                                                                                     |                                                                                                                                                              |  |
| <b>Type of Study</b>                                                                                                                                                         | Drug<br>Physiotherapy (Not Including YOGA)                                                                                                                                         |                                                                                                                                                              |  |
| <b>Study Design</b>                                                                                                                                                          | Randomized, Parallel Group, Multiple Arm Trial                                                                                                                                     |                                                                                                                                                              |  |
| <b>Public Title of Study</b>                                                                                                                                                 | Physiotherapy for Post-COVID-19 Conditions                                                                                                                                         |                                                                                                                                                              |  |
| <b>Scientific Title of Study</b>                                                                                                                                             | Comparing Effectiveness of Physiotherapy versus Drug Management on Fatigue, Physical Functioning, and Episodic Disability for Myalgic Encephalomyelitis in Post-COVID-19 Condition |                                                                                                                                                              |  |
| <b>Trial Acronym</b>                                                                                                                                                         | PCCPT                                                                                                                                                                              |                                                                                                                                                              |  |
| <b>Secondary IDs if Any</b>                                                                                                                                                  | <b>Secondary ID</b>                                                                                                                                                                | <b>Identifier</b>                                                                                                                                            |  |
|                                                                                                                                                                              | NIL                                                                                                                                                                                | NIL                                                                                                                                                          |  |
| <b>Details of Principal Investigator or overall Trial Coordinator (multi-center study)</b><br><a href="#">Clarification(s) with Reply</a><br><a href="#">Modification(s)</a> | <b>Name</b>                                                                                                                                                                        | Altaf Hossain Sarker                                                                                                                                         |  |
|                                                                                                                                                                              | <b>Designation</b>                                                                                                                                                                 | Professor                                                                                                                                                    |  |
|                                                                                                                                                                              | <b>Affiliation</b>                                                                                                                                                                 | Jashore University of Science and Technology (JUST)                                                                                                          |  |
|                                                                                                                                                                              | <b>Address</b>                                                                                                                                                                     | Room No 302, Department of Physiotherapy and Rehabilitation, M R Khan Medical Center, Jashore University of Science and Technology, Jashore-7408, Bangladesh |  |
|                                                                                                                                                                              |                                                                                                                                                                                    | 7408<br>Other                                                                                                                                                |  |
|                                                                                                                                                                              | <b>Phone</b>                                                                                                                                                                       | 8801571297407                                                                                                                                                |  |
|                                                                                                                                                                              | <b>Fax</b>                                                                                                                                                                         |                                                                                                                                                              |  |
|                                                                                                                                                                              | <b>Email</b>                                                                                                                                                                       | altafhossainsarker272@gmail.com                                                                                                                              |  |
| <b>Details Contact Person Scientific Query</b>                                                                                                                               | <b>Name</b>                                                                                                                                                                        | Dr Iqbal Kabir Jahid                                                                                                                                         |  |
|                                                                                                                                                                              | <b>Designation</b>                                                                                                                                                                 | Professor                                                                                                                                                    |  |
|                                                                                                                                                                              | <b>Affiliation</b>                                                                                                                                                                 | Jashore University of Science and Technology                                                                                                                 |  |
|                                                                                                                                                                              | <b>Address</b>                                                                                                                                                                     | Department of Microbiology, Jashore University of Science and Technology (JUST)<br>Jashore Bangladesh                                                        |  |
|                                                                                                                                                                              |                                                                                                                                                                                    | 7408<br>Other                                                                                                                                                |  |
|                                                                                                                                                                              | <b>Phone</b>                                                                                                                                                                       | 8801709818178                                                                                                                                                |  |
|                                                                                                                                                                              | <b>Fax</b>                                                                                                                                                                         |                                                                                                                                                              |  |
|                                                                                                                                                                              | <b>Email</b>                                                                                                                                                                       | ikjahid_mb@just.edu.bd                                                                                                                                       |  |
| <b>Details Contact Person Public Query</b><br><a href="#">Clarification(s) with Reply</a><br><a href="#">Modification(s)</a>                                                 | <b>Name</b>                                                                                                                                                                        | K M Amran Hossain                                                                                                                                            |  |
|                                                                                                                                                                              | <b>Designation</b>                                                                                                                                                                 | Lecturer                                                                                                                                                     |  |
|                                                                                                                                                                              | <b>Affiliation</b>                                                                                                                                                                 | Jashore University of Science and Technology                                                                                                                 |  |
|                                                                                                                                                                              | <b>Address</b>                                                                                                                                                                     | Room No 302, Department of Physiotherapy and Rehabilitation, M R Khan Medical Center, Jashore University of Science and Technology, Jashore-7408, Bangladesh |  |

|                                                                                                                          |                                                                           |                                                                                  |                                                                                                                                                                                                                                                                                                                                                                                                                                                                                                                                      |                        |                         |                               |
|--------------------------------------------------------------------------------------------------------------------------|---------------------------------------------------------------------------|----------------------------------------------------------------------------------|--------------------------------------------------------------------------------------------------------------------------------------------------------------------------------------------------------------------------------------------------------------------------------------------------------------------------------------------------------------------------------------------------------------------------------------------------------------------------------------------------------------------------------------|------------------------|-------------------------|-------------------------------|
|                                                                                                                          |                                                                           | 7408<br>Other                                                                    |                                                                                                                                                                                                                                                                                                                                                                                                                                                                                                                                      |                        |                         |                               |
|                                                                                                                          | <b>Phone</b>                                                              | 01778790798                                                                      |                                                                                                                                                                                                                                                                                                                                                                                                                                                                                                                                      |                        |                         |                               |
|                                                                                                                          | <b>Fax</b>                                                                |                                                                                  |                                                                                                                                                                                                                                                                                                                                                                                                                                                                                                                                      |                        |                         |                               |
|                                                                                                                          | <b>Email</b>                                                              | kma.hossain@just.edu.bd                                                          |                                                                                                                                                                                                                                                                                                                                                                                                                                                                                                                                      |                        |                         |                               |
| <b>Source of Monetary or Material Support</b>                                                                            | Physiotherapy unit, BRB Hospitals Ltd, Panthapath, Dhaka-1205, Bangladesh |                                                                                  |                                                                                                                                                                                                                                                                                                                                                                                                                                                                                                                                      |                        |                         |                               |
| <b>Primary Sponsor</b>                                                                                                   | <b>Name</b>                                                               | Jashore University of Science and Technology                                     |                                                                                                                                                                                                                                                                                                                                                                                                                                                                                                                                      |                        |                         |                               |
|                                                                                                                          | <b>Address</b>                                                            | Jashore University of Science and Technology Jashore-7408 Bangladesh             |                                                                                                                                                                                                                                                                                                                                                                                                                                                                                                                                      |                        |                         |                               |
|                                                                                                                          | <b>Type of Sponsor</b>                                                    | Government funding agency                                                        |                                                                                                                                                                                                                                                                                                                                                                                                                                                                                                                                      |                        |                         |                               |
| <b>Details of Secondary Sponsor</b>                                                                                      | <b>Name</b>                                                               | <b>Address</b>                                                                   |                                                                                                                                                                                                                                                                                                                                                                                                                                                                                                                                      |                        |                         |                               |
|                                                                                                                          | NIL                                                                       | NIL                                                                              |                                                                                                                                                                                                                                                                                                                                                                                                                                                                                                                                      |                        |                         |                               |
| <b>Countries of Recruitment</b>                                                                                          | Bangladesh                                                                |                                                                                  |                                                                                                                                                                                                                                                                                                                                                                                                                                                                                                                                      |                        |                         |                               |
| <b>Sites of Study</b><br><a href="#">Clarification(s) with Reply</a><br><a href="#">Modification(s)</a>                  | No of Sites = 1                                                           |                                                                                  |                                                                                                                                                                                                                                                                                                                                                                                                                                                                                                                                      |                        |                         |                               |
|                                                                                                                          | <b>Name of Principal Investigator</b>                                     | <b>Name of Site</b>                                                              | <b>Site Address</b>                                                                                                                                                                                                                                                                                                                                                                                                                                                                                                                  |                        |                         |                               |
|                                                                                                                          | Dr Tofajjal Hossain                                                       | BRB Hospital Limited and Specialized Physiotherapy Hospital Ltd                  | Room No 202, Department of Physiotherapy, BRB Hospital Limited, 77A Panthapath, Dhaka 1215, Bangladesh                                                                                                                                                                                                                                                                                                                                                                                                                               |                        |                         |                               |
|                                                                                                                          |                                                                           |                                                                                  | <b>Phone/Fax/Email</b><br>01715560669<br>yousufraju6423@gmail.com                                                                                                                                                                                                                                                                                                                                                                                                                                                                    |                        |                         |                               |
| <b>Details of Ethics Committee</b>                                                                                       | No of Ethics Committees= 1                                                |                                                                                  |                                                                                                                                                                                                                                                                                                                                                                                                                                                                                                                                      |                        |                         |                               |
|                                                                                                                          | <b>Name of Committee</b>                                                  | <b>Ethics Committee registered with DHR /CDSCO or not</b>                        | <b>Ethics Committee Registration No.</b>                                                                                                                                                                                                                                                                                                                                                                                                                                                                                             | <b>Approval Status</b> | <b>Date of Approval</b> | <b>Approval Document</b>      |
|                                                                                                                          | Institute of Physiotherapy, Rehabilitation & Research                     | Yes                                                                              | BPA-IPRR/IRB/19/01/2023/69                                                                                                                                                                                                                                                                                                                                                                                                                                                                                                           | Approved               | 13/02/2023              | <a href="#">Approval File</a> |
| <b>Regulatory Clearance Status from DCGI</b>                                                                             | <b>Status</b>                                                             | <b>Date</b>                                                                      | <b>Approval Document</b>                                                                                                                                                                                                                                                                                                                                                                                                                                                                                                             |                        |                         |                               |
|                                                                                                                          | Not Applicable                                                            | No Date Specified                                                                | No File Uploaded                                                                                                                                                                                                                                                                                                                                                                                                                                                                                                                     |                        |                         |                               |
| <b>Health Condition / Problems Studied</b>                                                                               | <b>Health Type</b>                                                        | <b>Condition</b>                                                                 |                                                                                                                                                                                                                                                                                                                                                                                                                                                                                                                                      |                        |                         |                               |
|                                                                                                                          | Patients                                                                  | <b>(1) ICD-10 Condition:</b> J984  Other disorders of lung,                      |                                                                                                                                                                                                                                                                                                                                                                                                                                                                                                                                      |                        |                         |                               |
| <b>Intervention / Comparator Agent</b><br><a href="#">Clarification(s) with Reply</a><br><a href="#">Modification(s)</a> | <b>Type</b>                                                               | <b>Name</b>                                                                      | <b>Details</b>                                                                                                                                                                                                                                                                                                                                                                                                                                                                                                                       |                        |                         |                               |
|                                                                                                                          | Intervention                                                              | Adapted physical activity and therapeutic exercise through telemedicine (APTE-T) | 3 Months. APTE-T the interventions will be provided by a consultant physiotherapist through digital media Such as Zoom, WhatsApp, Facebook Messenger, or the personalized app of the Department of Physiotherapy and Rehabilitation at Jashore University of Science and Technology. It will be a 45-minute session with a one-to-one approach. The patient will be performing exercises or advice at home. The physiotherapist will explain and demonstrate procedures through cameras, and the patient will perform. There will be |                        |                         |                               |

|                                                                   |                                                                                                                                                                                                                                                                                     |                                                                                                                                                                                                                                                                                                                                                                                                                              |                                                                                                                                                                                                                                                                                                                                                                                                                                                                                                                                                                                                                                                                                  |
|-------------------------------------------------------------------|-------------------------------------------------------------------------------------------------------------------------------------------------------------------------------------------------------------------------------------------------------------------------------------|------------------------------------------------------------------------------------------------------------------------------------------------------------------------------------------------------------------------------------------------------------------------------------------------------------------------------------------------------------------------------------------------------------------------------|----------------------------------------------------------------------------------------------------------------------------------------------------------------------------------------------------------------------------------------------------------------------------------------------------------------------------------------------------------------------------------------------------------------------------------------------------------------------------------------------------------------------------------------------------------------------------------------------------------------------------------------------------------------------------------|
|                                                                   |                                                                                                                                                                                                                                                                                     |                                                                                                                                                                                                                                                                                                                                                                                                                              | continuous communication with the patients to ensure that the interventions provided are performed accordingly and is safe.                                                                                                                                                                                                                                                                                                                                                                                                                                                                                                                                                      |
|                                                                   | Comparator Agent                                                                                                                                                                                                                                                                    | Drug Management (DM)                                                                                                                                                                                                                                                                                                                                                                                                         | 3 Months. Participants of the drug management group will receive the drug interventions as azithromycin, remdesivir, favipiravir, infliximab, tocilizumab, siltuximab, hydrocortisone, rituximab, rintatolimod, intravenous immunoglobulin [15, 16]. The drug interventions will be directly prescribed by a physician specialized in treating PCC cases. A single brand name will be prescribed for each drug. We will communicate with the patients to ensure no adverse effects of the medications. The patient will be given a choice if they are willing to join the exercise programs; they have full liberty to join the programs even after the completion of the trial. |
|                                                                   | Intervention                                                                                                                                                                                                                                                                        | Institute-based adapted physical activity and therapeutic exercise (APTE-I)                                                                                                                                                                                                                                                                                                                                                  | 3 Months. APTE-I will be provided under the consultation of a consultant physiotherapist specializing in Post-COVID-19 Condition rehabilitation. Interventions will be provided for 45-minute sessions in a one-to-one approach. There might be some home exercises or advice to follow at home. There will be continuous communication with patients. To ensure that the treatment does not deteriorate the symptoms.                                                                                                                                                                                                                                                           |
| <b>Inclusion Criteria</b>                                         | <b>Age From</b>                                                                                                                                                                                                                                                                     | 20.00 Year(s)                                                                                                                                                                                                                                                                                                                                                                                                                |                                                                                                                                                                                                                                                                                                                                                                                                                                                                                                                                                                                                                                                                                  |
|                                                                   | <b>Age To</b>                                                                                                                                                                                                                                                                       | 70.00 Year(s)                                                                                                                                                                                                                                                                                                                                                                                                                |                                                                                                                                                                                                                                                                                                                                                                                                                                                                                                                                                                                                                                                                                  |
|                                                                   | <b>Gender</b>                                                                                                                                                                                                                                                                       | Both                                                                                                                                                                                                                                                                                                                                                                                                                         |                                                                                                                                                                                                                                                                                                                                                                                                                                                                                                                                                                                                                                                                                  |
|                                                                   | <b>Details</b>                                                                                                                                                                                                                                                                      | 1) Diagnosis of long COVID according to who working group criteria1, 2) Diagnosis of chronic fatigue syndrome(CFS) according to the 2006 Canadian consensus criteria5, 3) Respondents meeting with persistent or relapsing chronic fatigue and post exertion malaise or fatigue criteria of the Canadian consensus guideline, and 4) willing to participate with the trail with a consent of adherence with the intervention |                                                                                                                                                                                                                                                                                                                                                                                                                                                                                                                                                                                                                                                                                  |
| <b>Exclusion Criteria</b>                                         | <b>Details</b>                                                                                                                                                                                                                                                                      | (1) any preexisting post-exertion symptoms exaggeration, (2) any preexisting clinical condition with fatigue as cardiovascular or neurological disability, (3) any red flags or signs that are explained as contraindication according to safe Post-COVID-19 condition rehabilitation guideline, and (4) patient drop-out within the 1st week of inclusion                                                                   |                                                                                                                                                                                                                                                                                                                                                                                                                                                                                                                                                                                                                                                                                  |
| <b>Method of Generating Random Sequence</b>                       | Computer generated randomization                                                                                                                                                                                                                                                    |                                                                                                                                                                                                                                                                                                                                                                                                                              |                                                                                                                                                                                                                                                                                                                                                                                                                                                                                                                                                                                                                                                                                  |
| <b>Method of Concealment</b>                                      | Sequentially numbered, sealed, opaque envelopes                                                                                                                                                                                                                                     |                                                                                                                                                                                                                                                                                                                                                                                                                              |                                                                                                                                                                                                                                                                                                                                                                                                                                                                                                                                                                                                                                                                                  |
| <b>Blinding/Masking</b>                                           | Participant, Investigator and Outcome Assessor Blinded                                                                                                                                                                                                                              |                                                                                                                                                                                                                                                                                                                                                                                                                              |                                                                                                                                                                                                                                                                                                                                                                                                                                                                                                                                                                                                                                                                                  |
| <b>Primary Outcome</b>                                            | <b>Outcome</b>                                                                                                                                                                                                                                                                      | <b>TimePoints</b>                                                                                                                                                                                                                                                                                                                                                                                                            |                                                                                                                                                                                                                                                                                                                                                                                                                                                                                                                                                                                                                                                                                  |
|                                                                   | Chalder fatigue Scale (CFS)                                                                                                                                                                                                                                                         | At baseline, 12 weeks and 6 months                                                                                                                                                                                                                                                                                                                                                                                           |                                                                                                                                                                                                                                                                                                                                                                                                                                                                                                                                                                                                                                                                                  |
| <b>Secondary Outcome</b>                                          | <b>Outcome</b>                                                                                                                                                                                                                                                                      | <b>TimePoints</b>                                                                                                                                                                                                                                                                                                                                                                                                            |                                                                                                                                                                                                                                                                                                                                                                                                                                                                                                                                                                                                                                                                                  |
|                                                                   | Physical Functioning sub-domain of SF-36                                                                                                                                                                                                                                            | At baseline, 12 weeks and 6 months                                                                                                                                                                                                                                                                                                                                                                                           |                                                                                                                                                                                                                                                                                                                                                                                                                                                                                                                                                                                                                                                                                  |
|                                                                   | Disability Adjacent Life Years (DALYs)                                                                                                                                                                                                                                              | At baseline, 12 weeks and 6 months                                                                                                                                                                                                                                                                                                                                                                                           |                                                                                                                                                                                                                                                                                                                                                                                                                                                                                                                                                                                                                                                                                  |
| <b>Target Sample Size</b>                                         | <b>Total Sample Size="124"</b><br><b>Sample Size from India="124"</b><br><b>Final Enrollment numbers achieved (Total)=</b> "Applicable only for Completed/Terminated trials"<br><b>Final Enrollment numbers achieved (India)="</b> Applicable only for Completed/Terminated trials" |                                                                                                                                                                                                                                                                                                                                                                                                                              |                                                                                                                                                                                                                                                                                                                                                                                                                                                                                                                                                                                                                                                                                  |
| <b>Phase of Trial Clarification(s) with Reply Modification(s)</b> | Phase 4                                                                                                                                                                                                                                                                             |                                                                                                                                                                                                                                                                                                                                                                                                                              |                                                                                                                                                                                                                                                                                                                                                                                                                                                                                                                                                                                                                                                                                  |
| <b>Date of First Enrollment</b>                                   | 10/05/2024                                                                                                                                                                                                                                                                          |                                                                                                                                                                                                                                                                                                                                                                                                                              |                                                                                                                                                                                                                                                                                                                                                                                                                                                                                                                                                                                                                                                                                  |

|                                                                                            |                                                                                                                                                                                                                                                                                                                                                                                                                                                                                                                                                                                                                                                                                                                                                                                                                                                                                                                                                                                                                                                                                                                                                                                                                                                                                           |
|--------------------------------------------------------------------------------------------|-------------------------------------------------------------------------------------------------------------------------------------------------------------------------------------------------------------------------------------------------------------------------------------------------------------------------------------------------------------------------------------------------------------------------------------------------------------------------------------------------------------------------------------------------------------------------------------------------------------------------------------------------------------------------------------------------------------------------------------------------------------------------------------------------------------------------------------------------------------------------------------------------------------------------------------------------------------------------------------------------------------------------------------------------------------------------------------------------------------------------------------------------------------------------------------------------------------------------------------------------------------------------------------------|
| <b>(India)</b><br>Clarification(s) with Reply Modification(s)                              |                                                                                                                                                                                                                                                                                                                                                                                                                                                                                                                                                                                                                                                                                                                                                                                                                                                                                                                                                                                                                                                                                                                                                                                                                                                                                           |
| <b>Date of Study Completion (India)</b>                                                    | Applicable only for Completed/Terminated trials                                                                                                                                                                                                                                                                                                                                                                                                                                                                                                                                                                                                                                                                                                                                                                                                                                                                                                                                                                                                                                                                                                                                                                                                                                           |
| <b>Date of First Enrollment (Global)</b>                                                   | 20/05/2024                                                                                                                                                                                                                                                                                                                                                                                                                                                                                                                                                                                                                                                                                                                                                                                                                                                                                                                                                                                                                                                                                                                                                                                                                                                                                |
| <b>Date of Study Completion (Global)</b>                                                   | Applicable only for Completed/Terminated trials                                                                                                                                                                                                                                                                                                                                                                                                                                                                                                                                                                                                                                                                                                                                                                                                                                                                                                                                                                                                                                                                                                                                                                                                                                           |
| <b>Estimated Duration of Trial</b>                                                         | <b>Years="0"</b><br><b>Months="6"</b><br><b>Days="0"</b>                                                                                                                                                                                                                                                                                                                                                                                                                                                                                                                                                                                                                                                                                                                                                                                                                                                                                                                                                                                                                                                                                                                                                                                                                                  |
| <b>Recruitment Status of Trial (Global)</b><br>Clarification(s) with Reply Modification(s) | Not Yet Recruiting                                                                                                                                                                                                                                                                                                                                                                                                                                                                                                                                                                                                                                                                                                                                                                                                                                                                                                                                                                                                                                                                                                                                                                                                                                                                        |
| <b>Recruitment Status of Trial (India)</b>                                                 | Not Applicable                                                                                                                                                                                                                                                                                                                                                                                                                                                                                                                                                                                                                                                                                                                                                                                                                                                                                                                                                                                                                                                                                                                                                                                                                                                                            |
| <b>Publication Details</b>                                                                 | N/A                                                                                                                                                                                                                                                                                                                                                                                                                                                                                                                                                                                                                                                                                                                                                                                                                                                                                                                                                                                                                                                                                                                                                                                                                                                                                       |
| <b>Individual Participant Data (IPD) Sharing Statement</b>                                 | <p><b>Will individual participant data (IPD) be shared publicly (including data dictionaries)?</b></p> <p><b>Response - YES</b></p> <ol style="list-style-type: none"> <li>What data in particular will be shared?<br/><b>Response -</b> All of the individual participant data collected during the trial, after de-identification.</li> <li>What additional supporting information will be shared?<br/><b>Response -</b> Study Protocol<br/><b>Response -</b> Statistical Analysis Plan<br/><b>Response -</b> Informed Consent Form<br/><b>Response -</b> Clinical Study Report</li> <li>Who will be able to view these files?<br/><b>Response -</b> Anyone</li> <li>For what types of analyses will this data be available?<br/><b>Response -</b> For individual participant data meta-analysis.</li> <li>By what mechanism will data be made available?<br/><b>Response -</b> Proposals should be directed to [altafhossainsarker272@gmail.com].</li> <li>For how long will this data be available <i>start date provided 31-05-2024 and end date provided 31-12-2028</i>?<br/><b>Response -</b> Immediately following publication. No end date.</li> <li>Any URL or additional information regarding plan/policy for sharing IPD?<br/><b>Additional Information -</b> NIL</li> </ol> |
| <b>Result Disclosure</b>                                                                   | <p><b>Do you wish to upload results?</b></p> <p><b>Response -</b> Summary results have not yet been disclosed</p>                                                                                                                                                                                                                                                                                                                                                                                                                                                                                                                                                                                                                                                                                                                                                                                                                                                                                                                                                                                                                                                                                                                                                                         |
| <b>Brief Summary</b>                                                                       | ME/CFS patients will be recruited and treated in three specialized Hospitals. The study will be conducted in BRB Hospital Limited and Specialized Physiotherapy Hospital Ltd in the Dhaka division. In the Khulna division, the treatment center will be the Department of Physiotherapy and Rehabilitation at Jashore University of Science and Technology. The APTE-I, APTE-T, and DM groups will be recruited from any centers. However, the DM group will have respondents from the participants who are not willing to take any exercise interventions and only accept to take drug management. To prevent cross-contamination of the data,                                                                                                                                                                                                                                                                                                                                                                                                                                                                                                                                                                                                                                          |

different treatments set up will be arranged in each study setting, and separate personnel will be employed for each treatment group.
